# Supplementary material for: Effects of the solubility of yeast cell wall preparations on their potential prebiotic properties in dogs
Source: PLoS One. 2019 Nov 25;14(11):e0225659. doi: 10.1371/journal.pone.0225659 (PMC6878821; doi:10.1371/journal.pone.0225659)
Supplement: S1 Table — CON = control, without yeast cell wall addition. YCW = 0.3% of a standard yeast cell wall extract.YCWs = 0.3% of a yeast cell wall extract with 20% soluble mannan oligosaccharides.VFA = volatile fatty acids. SCFA = short-chain fatty acids. BCFA = branched-chain fatty acids. (XLSX) [file pone.0225659.s001.xlsx]

## Sheet: Digestibility
Treatment	Block	Repetition	Animal	Dry Matter (%)	Crude Energy (%)	Crude Protein (%)	Fat (%)	Organic Matter (%)
CO	1	1	1	80.5	85.8058	84.9931	95.1	85.62
CO	1	2	2	82.25	86.7578	86.339	94.91	86.85
CO	1	3	3	79.9	84.4327	82.9617	94.03	85.09
CO	1	4	4	79.84	85.316	83.3792	94.37	85.17
CO	2	1	5	80.11	84.4652	83.566	93.83	85.1
CO	2	2	6	78.47	84.1771	84.7613	93.3	83.99
CO	2	3	7	81.58	86.4021	85.252	94.97	86.55
CO	2	4	8	80.76	85.0834	89.5355	93.96	85.72
YCW	1	1	1	81.41	86.0752	86.0917	91.02	86.18
YCW	1	2	2	78.49	81.6248	84.3179	94.45	84.21
YCW	1	3	3	79.57	85.3798	85.0443	92.3	84.99
YCW	1	4	4	77.77	83.6685	81.5934	91.35	83.41
YCW	2	1	5	78.08	83.6807	82.9116	90.45	83.67
YCW	2	2	6	81.16	86.0575	88.4775	94.71	86.17
YCW	2	3	7	82.05	86.4955	87.2544	93.26	86.75
YCW	2	4	8	78.84	85.0872	84.1723	91.77	84.35
YCWs	1	1	1	76.77	84.03	81.4233	92.46	82.94
YCWs	1	2	2	77.4	83.2929	81.0013	89.94	83.03
YCWs	1	3	3	74.96	82.3819	82.1736	88.7	81.2
YCWs	1	4	4	85.43	89.8261	88.7654	95.25	89.35
YCWs	2	1	5	78	84.0927	82.3258	89.91	83.45
YCWs	2	2	6	80.19	86.5174	84.8943	91.59	85.22
YCWs	2	3	7	73.42	81.0026	78.9731	91.98	80.07
YCWs	2	4	8	82.08	86.987	85.0403	93.05	86.62

## Sheet: Nutrient intake
Treatment	Block	Repetition	Animal	Dry Matter (g/dog/day)
CO	1	1	1	152.739
CO	1	2	2	177.644
CO	1	3	3	162.183
CO	1	4	4	160.436
CO	2	1	5	144.213
CO	2	2	6	160.496
CO	2	3	7	174.215
CO	2	4	8	151.06
YCW	1	1	1	155.832
YCW	1	2	2	160.153
YCW	1	3	3	159.282
YCW	1	4	4	191.499
YCW	2	1	5	182.828
YCW	2	2	6	179.295
YCW	2	3	7	163.641
YCW	2	4	8	172.359
YCWs	1	1	1	177.743
YCWs	1	2	2	172.519
YCWs	1	3	3	159.599
YCWs	1	4	4	144.968
YCWs	2	1	5	159.609
YCWs	2	2	6	162.239
YCWs	2	3	7	162.189
YCWs	2	4	8	166.532

## Sheet: Fecal characteristics
Treatment	Block	Repetition	Animal	Fecal Score	Fecal Dry Matter (%)	Fecal Production (g/dog/day)	Fecal Production in Dry Matter (g/dog/day)	Fecal pH
CO	1	1	1	3.5	42.7591	75.2	32.1549	7.01667
CO	1	2	2	3.2	39.8817	85.37	34.047	7.03
CO	1	3	3	3.2	39.7393	88.574	35.1987	6.62667
CO	1	4	4	3.4	46.2689	75.462	34.9155	6.72
CO	2	1	5	3.75	46.5468	66.538	30.9713	6.54667
CO	2	2	6	3.9	47.1058	79.206	37.3106	7.08667
CO	2	3	7	4	49.4908	70.03	34.6584	6.85667
CO	2	4	8	4	48.7478	64.38	31.3838	6.73333
YCW	1	1	1	3.6	43.4028	71.562	31.0599	6.94667
YCW	1	2	2	3.8	51.0763	72.292	36.9241	6.78333
YCW	1	3	3	4	48.5579	71.85	34.8889	6.89667
YCW	1	4	4	3.4	41.8485	109.058	45.6392	6.83333
YCW	2	1	5	4	43.672	98.392	42.9698	6.96667
YCW	2	2	6	3.9	47.1491	76.788	36.2049	7.02
YCW	2	3	7	3.75	48.2319	65.276	31.4839	6.69667
YCW	2	4	8	4	45.0529	86.78	39.0969	6.97667
YCWs	1	1	1	3.5	41.5263	107.074	44.4638	6.84667
YCWs	1	2	2	3.2	39.4229	106.496	41.9838	6.71
YCWs	1	3	3	3.9	55.8631	77.034	43.0335	6.91
YCWs	1	4	4	4	36.2857	62.666	22.7388	6.55
YCWs	2	1	5	3.4	43.6638	86.58	37.8041	6.61667
YCWs	2	2	6	3.8	45.9528	75.32	34.6116	6.86333
YCWs	2	3	7	3.8	42.7922	108.496	46.4278	6.76667
YCWs	2	4	8	4	50.4446	63.712	32.1393	6.76

## Sheet: Animals Weight
Treatment	Block	Repetition	Animal	Day 0 (kg)	Day 30 (kg)
CO	1	1	1	10.6	10.46
CO	1	2	2	13.1	13.08
CO	1	3	3	11.7	11.14
CO	1	4	4	11.8	11.25
CO	2	1	5	10.35	9.95
CO	2	2	6	11.5	11.3
CO	2	3	7	14	13.6
CO	2	4	8	10.1	9.6
YCW	1	1	1	10.8	10.68
YCW	1	2	2	11.75	11.05
YCW	1	3	3	11.25	11.1
YCW	1	4	4	14.4	14.2
YCW	2	1	5	13.05	13.4
YCW	2	2	6	13.05	13
YCW	2	3	7	12.05	11.6
YCW	2	4	8	12.45	12.25
YCWs	1	1	1	13.2	13.2
YCWs	1	2	2	12.7	12.28
YCWs	1	3	3	11.3	11.43
YCWs	1	4	4	10.2	9.6
YCWs	2	1	5	11.6	10.97
YCWs	2	2	6	11.9	11.5
YCWs	2	3	7	11.6	11.4
YCWs	2	4	8	12.3	11.9

## Sheet: Fermentation Products
Treatment	Block	Repetition	Animal	Acetic acid (mMol/g)	Propionic acid (mMol/g)	Butyric acid (mMol/g)	Isobutyric acid (mMol/g)	Isovaleric acid (mMol/g)	Valeric acid (mMol/g)	Total VFA1 (mMol/g)	Total SCFA2 (mMol/g)	Total BCFA3 (mMol/g)	Ammonia (mMol/kg)	Lactic acid (mMol/kg)
CO	1	1	1	229.183	107.913	45.9629	9.227	11.4071	1.88365	405.577	383.059	22.5177	155.012	2.80567
CO	1	2	2	215.345	90.6855	41.6406	10.0361	13.1813	1.45245	372.341	347.671	24.6699	179.769	3.36696
CO	1	3	3	317.925	150.325	NA	12.1554	17.7891	1.47969	565.087	533.663	31.4242	218.698	2.94047
CO	1	4	4	267.133	119.206	42.4824	11.1737	14.3401	1.8775	456.213	428.822	27.3913	207.559	3.21005
CO	2	1	5	265.221	134.231	53.0075	11.6342	17.1002	4.79628	485.99	452.459	33.5307	229.013	1.42576
CO	2	2	6	176.286	87.2454	44.1406	9.23015	13.6811	3.46643	334.049	307.672	26.3777	204.633	1.89598
CO	2	3	7	177.597	89.7518	53.8879	8.90549	13.7454	3.47508	347.362	321.236	26.126	173.829	3.00586
CO	2	4	8	193.537	111.662	46.472	8.57401	12.9018	3.20278	376.349	351.67	24.6786	187.823	NA
YCW	1	1	1	194.579	79.9642	42.2162	9.51837	11.7673	2.90976	340.955	316.76	24.1954	173.438	2.10428
YCW	1	2	2	184.671	85.3543	48.1832	8.64397	12.295	1.34199	340.49	318.209	22.2809	157.108	3.5457
YCW	1	3	3	224.365	119.366	45.1571	8.79297	10.7105	1.55988	409.951	388.888	21.0634	170.986	2.13666
YCW	1	4	4	212.448	106.214	35.2577	9.00063	12.3155	2.97923	378.215	353.92	24.2954	156.984	4.05905
YCW	2	1	5	239.485	104.275	35.77	9.02098	10.3919	4.4791	403.422	379.53	23.892	159.219	3.36723
YCW	2	2	6	252.967	109.007	42.5218	11.1488	14.3326	5.13253	435.109	404.495	30.6139	203.463	NA
YCW	2	3	7	258.191	131.378	54.8632	11.3277	15.5861	4.90303	476.249	444.432	31.8168	208.206	2.95
YCW	2	4	8	180.385	79.8607	45.4415	9.53312	14.138	4.65389	334.012	305.687	28.325	166.169	2.09228
YCWs	1	1	1	330.674	158.399	67.2581	15.1672	18.1393	2.35864	591.996	556.331	35.6651	208.402	1.38181
YCWs	1	2	2	228.497	111.261	54.718	9.8408	13.7653	1.39321	419.475	394.476	24.9993	121.215	1.73764
YCWs	1	3	3	172.474	85.357	49.8058	10.7903	16.5735	3.86179	338.863	307.637	31.2256	193.581	1.59475
YCWs	1	4	4	258.409	135.073	50.3011	9.6637	13.9078	4.46324	471.818	443.783	28.0347	203.754	2.15134
YCWs	2	1	5	256.421	108.116	61.997	6.50302	9.3409	4.06726	446.445	426.534	19.9112	206.324	NA
YCWs	2	2	6	166.93	73.4759	56.7495	10.1946	16.5734	3.14637	327.07	297.155	29.9144	212.287	1.71994
YCWs	2	3	7	243.464	103.968	58.5119	9.41629	13.5979	3.70108	432.659	405.943	26.7153	226.95	1.73722
YCWs	2	4	8	183.048	89.2653	45.4898	9.964	14.8478	4.47309	347.088	317.803	29.2849	195.962	NA
1: VFA = volatile fatty acids.
2: SCFA = short-chain fatty acids.
3: BCFA = branched-chain fatty acids.

## Sheet: Biogenic Amines
Treatment	Block	Repetition	Animal	Putrescine (mg/100g)	Cadaverine (mg/100g)	Spermidine (mg/100g)	Phenylethylamine (mg/100g)
CO	1	1	1	NA	NA	NA	NA
CO	1	2	2	3.61874	0.763905	1.4955	0.126933
CO	1	3	3	4.09226	2.55952	0.920139	0.176091
CO	1	4	4	10.48	11.136	3.39467	0.285333
CO	2	1	5	16.185	5.76676	2.75335	1.7748
CO	2	2	6	8.93997	1.42509	2.91779	1.42239
CO	2	3	7	9.59971	1.03105	0.839398	0.441533
CO	2	4	8	15.4221	6.78649	3.87527	1.7402
YCW	1	1	1	6.47559	1.32598	1.60945	0.229921
YCW	1	2	2	20.223	NA	2.71424	0.691303
YCW	1	3	3	4.21003	1.70051	3.57551	NA
YCW	1	4	4	6.32599	3.68058	1.79428	0.190601
YCW	2	1	5	10.9133	3.61241	2.20433	1.00703
YCW	2	2	6	17.8692	5.74468	5.4303	2.01016
YCW	2	3	7	19.0332	3.34758	2.3512	1.38112
YCW	2	4	8	13.7376	3.94415	4.55497	2.38802
YCWs	1	1	1	5.40733	1.24785	1.05587	0.147674
YCWs	1	2	2	6.00602	1.17411	0.863021	0.180632
YCWs	1	3	3	22.8326	4.69433	4.22683	NA
YCWs	1	4	4	22.5315	6.34475	3.40064	0.538484
YCWs	2	1	5	42.1311	12.9708	4.0859	1.49504
YCWs	2	2	6	36.8063	4.48718	3.58974	1.35613
YCWs	2	3	7	24.0829	7.28477	4.45148	1.62684
YCWs	2	4	8	18.4392	3.2448	5.41347	2.24808

## Sheet: Immunoglobulin A
Treatment	Block	Repetition	Animal	Day 0 (mg/g)	Day 30 (mg/g)
CO	1	1	1	2.86	0.42
CO	1	2	2	8.33	0.76
CO	1	3	3	17.1	11.34
CO	1	4	4	3.39	1.8
CO	2	1	5	11.96	1.45
CO	2	2	6	16.04	6.01
CO	2	3	7	7.76	0.68
CO	2	4	8	5.09	1.21
YCW	1	1	1	3.06	0.31
YCW	1	2	2	15.24	9.2
YCW	1	3	3	20.78	2.38
YCW	1	4	4	20.2	1.24
YCW	2	1	5	5.51	0
YCW	2	2	6	4.2	3.69
YCW	2	3	7	10.11	10.81
YCW	2	4	8	8.55	1.44
YCWs	1	1	1	7.8	1.84
YCWs	1	2	2	14.99	3.02
YCWs	1	3	3	17.34	3.27
YCWs	1	4	4	5.88	0
YCWs	2	1	5	NA	NA
YCWs	2	2	6	6.42	5.58
YCWs	2	3	7	14.04	4.73
YCWs	2	4	8	22.36	1.08

## Sheet: Serum Cytokines
				IL-6 (pg/mL)		IL-10 (pg/mL)		TNF-α (pg/mL)
Treatment	Block	Repetition	Animal	Day 0	Day 30	Day 0	Day 30	Day 0	Day 30
CO	1	1	1	167	110	87.44	58.97	171	116
CO	1	2	2	NA	NA	13.55	8.03	117	51.28
CO	1	3	3	3.47	2.62	3.46	4.9	1.54	2.83
CO	1	4	4	16.95	31.61	6.04	6.95	38.35	33.7
CO	2	1	5	4.96	2.62	13.25	4.9	3.16	1.46
CO	2	2	6	4.81	5.2	10.91	4.18	6.38	4.08
CO	2	3	7	75.2	56.79	12.66	16.7	119	107
CO	2	4	8	6.35	11.54	23.89	12.38	4.71	22.49
YCW	1	1	1	44.02	21.72	177	70.64	79.49	43.72
YCW	1	2	2	5.73	4.27	6.8	7.22	2.84	1.72
YCW	1	3	3	13.48	10.89	34.77	46.92	2.78	3.34
YCW	1	4	4	10.62	7.61	7.59	1.69	4.22	1.67
YCW	2	1	5	NA	NA	42.5	30.86	4.64	1.51
YCW	2	2	6	16.01	8.27	8.39	6.95	18.75	7.37
YCW	2	3	7	NA	NA	8.39	8.03	77.98	22.57
YCW	2	4	8	3.18	2.62	15.36	16.7	2.07	1.72
YCWs	1	1	1	9.67	8.27	39.13	29.85	13.94	12.37
YCWs	1	2	2	44.3	21.56	12.66	12.68	109	56.1
YCWs	1	3	3	75.96	46.5	12.66	4.9	94.04	70.8
YCWs	1	4	4	27.5	11.54	63.17	52.77	33.03	17.7
YCWs	2	1	5	4.36	3.21	9.77	10.89	5.06	4.85
YCWs	2	2	6	NA	NA	22.59	7.49	163	170
YCWs	2	3	7	22.06	14.81	12.66	6.95	4.22	1.83
YCWs	2	4	8	6.51	4.11	3.68	9.72	4.92	3.34

## Sheet: H2O2 Production
				Monocytes (µM of H2O2/2x105 cells)				Neutrophils (µM of H2O2/2x105 cells)
				Phorbol myristate acetate		Phorbol myristate acetate + Lipopolysaccharide		Only cells		Lipopolysaccharide		Phorbol myristate acetate		Phorbol myristate acetate + Lipopolysaccharide
Treatment	Block	Repetition	Animal	Day 0	Day 30	Day 0	Day 30	Day 0	Day 30	Day 0	Day 30	Day 0	Day 30	Day 0	Day 30
CO	1	1	1	1.37958	1.27204	1.69068	4.2304	0.157602	0.323483	0.403339	0.757286	0.452486	5.74141	0.843287	4.70017
CO	1	2	2	1.76811	2.89787	2.00988	2.39644	0.55641	0	0.612438	0.0563055	3.3886	7.71233	2.63606	3.30711
CO	1	3	3	1.18564	1.74538	0.708894	2.47313	0.874995	1.11783	0.094186	0.20061	4.16866	4.9987	2.17106	3.00245
CO	1	4	4	2.25934	2.83329	2.04054	2.65787	0.51178	0.670513	1.05905	0.957134	1.92253	5.83779	2.81972	4.48285
CO	2	1	5	3.53496	0.821026	4.56623	0.818948	0.45018	0.456367	0.433585	0.539249	3.73599	1.60923	2.66395	1.20127
CO	2	2	6	2.84819	1.73488	2.63662	1.27536	0.768127	0.61885	0.418213	0.512185	3.98325	4.48546	2.63944	3.56814
CO	2	3	7	2.4181	2.24311	1.8965	2.28272	0.309165	0.316038	0.26243	0.882662	3.0881	3.81848	2.10738	2.82158
CO	2	4	8	4.3051	2.10216	3.93194	2.01479	0.556588	0.470975	0.574467	0.847248	4.04813	1.88016	3.17461	1.9318
YCW	1	1	1	1.25797	3.33872	1.82855	3.12328	0.515761	0.410939	0.263084	0.856694	5.8989	14.0754	6.15707	11.037
YCW	1	2	2	3.39199	3.33488	2.68817	2.19404	0.629741	0	0.518508	0	5.15323	7.72156	4.2304	5.16648
YCW	1	3	3	3.6879	1.16525	3.51579	2.27831	0.62822	0.438594	0.840188	0.622881	4.14308	3.21396	4.73924	5.2743
YCW	1	4	4	3.48193	2.21493	4.47059	3.508	7.26009	0.479137	7.72029	0.300009	10.2311	4.20543	9.62331	2.28147
YCW	2	1	5	3.99871	1.31972	5.80263	1.33842	0.257678	0.406018	0.642682	0.65389	4.73335	2.30637	3.68372	2.5625
YCW	2	2	6	2.73985	1.24497	2.84819	1.95931	0.39185	0.744412	0.480527	1.18479	3.60578	3.63037	3.0881	3.77289
YCW	2	3	7	3.79163	2.35602	2.64979	2.37062	0.365025	0.799993	0.697067	0.868401	3.45301	3.16007	2.5565	2.38193
YCW	2	4	8	3.11336	1.22366	4.3523	1.56716	6.75838	0.640183	7.92813	0.778848	9.90318	3.14681	7.62173	3.09348
YCWs	1	1	1	2.7371	1.72408	2.31691	2.05778	1.00315	0.586534	0.411266	0.490485	4.81868	4.21849	3.10248	5.57989
YCWs	1	2	2	3.7991	3.00075	4.15568	2.24853	0.920852	0.571678	0.824665	0.79181	6.0232	2.66968	5.04612	2.04971
YCWs	1	3	3	3.60608	2.29521	3.91833	1.73319	2.36288	1.30106	0.601724	0.438594	5.20982	4.50766	4.49774	2.62424
YCWs	1	4	4	3.45468	3.03264	3.51817	2.9529	0.655508	0.531245	0.427478	0.42043	4.81809	3.54122	3.55439	2.63374
YCWs	2	1	5	3.41091	0.704248	3.01932	0.667677	0.547261	0.274336	0.169725	0.297574	4.43298	0.911057	2.15698	0.921127
YCWs	2	2	6	3.44576	2.12834	3.50015	2.64932	1.863	0.624183	1.65359	1.00818	11.5432	5.62144	9.3668	3.26734
YCWs	2	3	7	2.59588	1.72503	2.58455	1.36279	2.60695	1.4627	1.1962	0.654626	8.46304	5.89639	5.27415	2.68976
YCWs	2	4	8	2.8917	2.17788	2.29659	2.02062	0.463105	0.656013	0.451867	0.758713	4.79395	4.50374	3.72886	4.07287

## Sheet: NO Production
				Monocytes (µM of NO/2x105 cells)				Neutrophils (µM of NO/2x105 cells)
				Only cells		Lipopolysaccharide		Only cells		Lipopolysaccharide
Treatment	Block	Repetition	Animal	Day 0	Day 30	Day 0	Day 30	Day 0	Day 30	Day 0	Day 30
CO	1	1	1	1.50947	2.13255	0.762942	1.92788	1.0574	2.79116	1.0931	3.52109
CO	1	2	2	0.900152	16.8404	0.88024	21.4256	1.34613	24.186	1.62779	32.2892
CO	1	3	3	0.75334	1.2861	0.791746	2.79514	2.3664	2.39948	2.2236	4.98096
CO	1	4	4	1.20381	13.8272	1.1391	13.6962	1.76249	44.1526	2.30132	63.4306
CO	2	1	5	0.91864	0.49324	1.29775	1.51426	6.65049	4.872	5.91258	3.57564
CO	2	2	6	5.41423	0.629376	4.77229	0.579872	4.88164	7.78604	9.813	6.63372
CO	2	3	7	3.99278	3.25676	5.13911	2.46263	7.1236	8.75672	14.7634	11.8575
CO	2	4	8	3.20672	2.49389	3.21327	2.96286	4.6008	6.08804	7.8614	5.50347
YCW	1	1	1	NA	NA	0.88024	15.9233	NA	NA	NA	NA
YCW	1	2	2	0.959888	15.1372	1.10425	20.4103	1.76249	29.1115	2.19355	39.2801
YCW	1	3	3	NA	NA	0.897364	2.1418	3.485	2.74487	4.88523	7.24197
YCW	1	4	4	NA	NA	0.741338	1.56363	1.32687	1.64819	1.27603	3.37866
YCW	2	1	5	2.28345	4.21842	1.95259	0.579872	6.07729	4.8166	6.99968	4.83876
YCW	2	2	6	5.39589	7.4025	4.2679	3.95709	6.0526	4.52072	7.433	5.13494
YCW	2	3	7	4.46048	2.40635	4.45131	3.05666	7.8614	5.68138	9.5274	6.92677
YCW	2	4	8	1.78716	0.480864	1.95259	0.233344	15.993	4.55807	9.73391	4.5119
YCWs	1	1	1	0.885362	1.35548	1.1014	2.15336	1.7119	4.37565	1.9975	6.60105
YCWs	1	2	2	1.01962	11.4035	0.939976	10.421	2.31111	20.8495	2.81075	31.6536
YCWs	1	3	3	1.41585	1.36705	0.833353	1.80646	4.08238	1.82978	4.67897	3.66351
YCWs	1	4	4	5.55956	11.076	1.03954	11.9494	1.94863	20.8495	1.90944	29.9059
YCWs	2	1	5	2.5316	1.8546	1.78716	1.26674	5.78081	3.6255	6.14976	4.1795
YCWs	2	2	6	15.4169	0	0.746315	0.0394533	8.67975	6.3678	9.20683	5.29673
YCWs	2	3	7	1.91813	2.80654	1.67687	2.68148	7.17757	5.35098	6.99309	8.17215
YCWs	2	4	8	4.02717	2.08119	3.67181	3.40057	10.051	28.4541	10.4794	29.7673

[truncated: 2 more sheets: Phagocytic Day 15, Phagocytic Day 30]
